# Supplementary material for: Production of Hemicellulose Sugars Combined with the Alkaline Extraction Lignin Increased the Hydro-Depolymerization of Cellulose from Corn Cob
Source: MDPI journal article supplement (doi:10.3390/su15119041), 2023-06-02
Supplement: s1 [file s1]

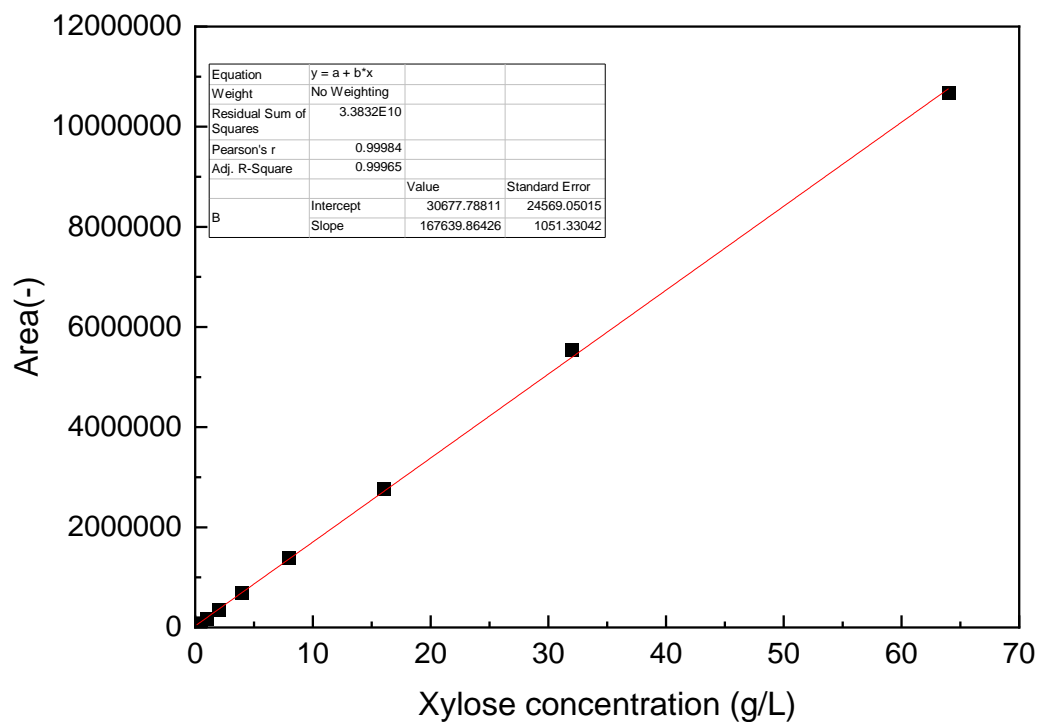

**Figure S1.** The standard curve of xylose

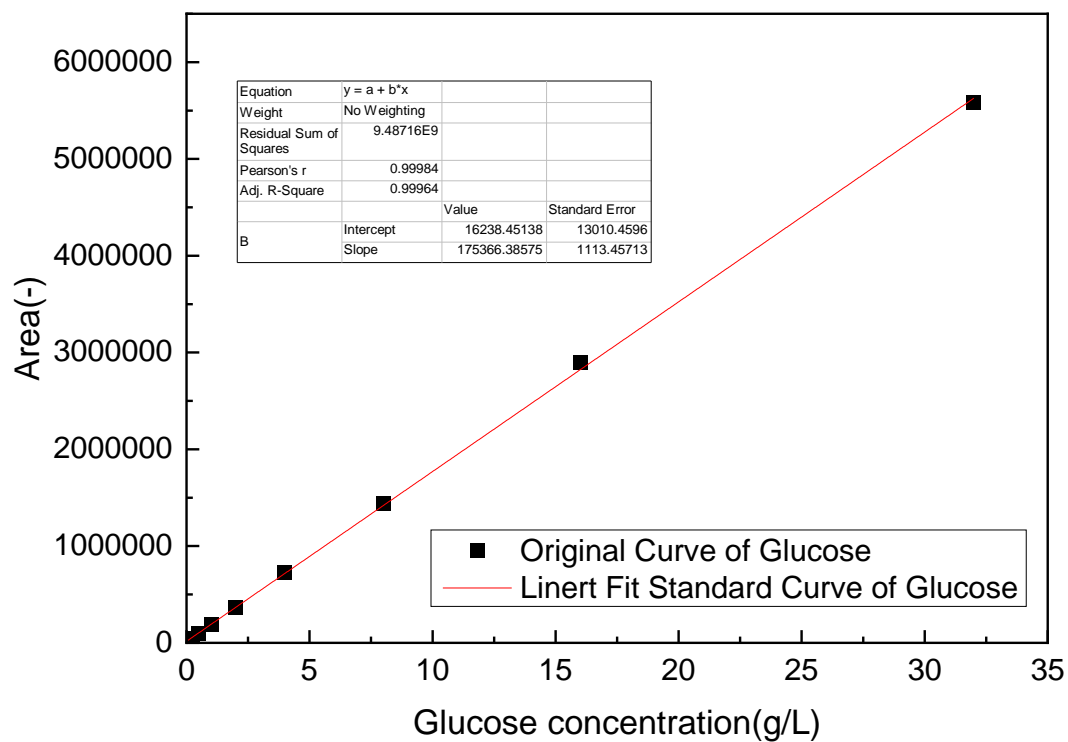

**Figure S2.** The standard curve of glucose

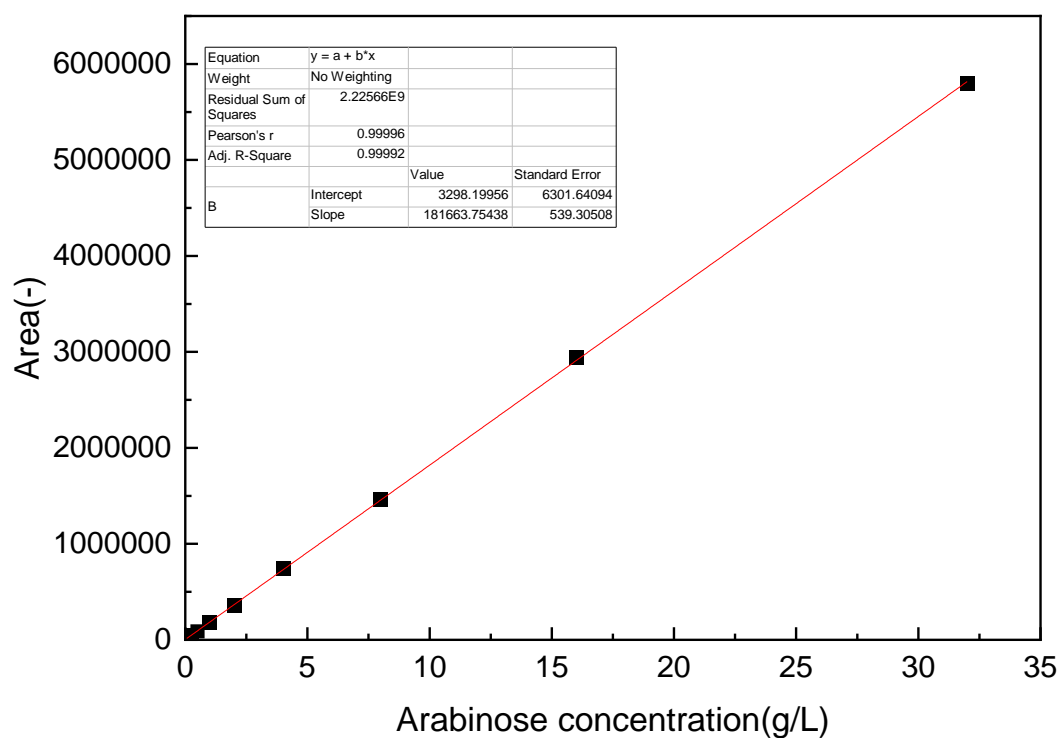

**Figure S3.** The standard curve of arabinose

The regression equation for the standard curve is as follows:

Xylose  $Y = 30677.78811 + 167839.86426X$ ,  $R^2 = 0.9996$ ;

Glucose  $Y = 16238.45138 + 175366.38575X$ ,  $R^2 = 0.9996$ ;

Arabinose  $Y = 3298.19956 + 181663.75438X$ ,  $R^2 = 0.9999$ .

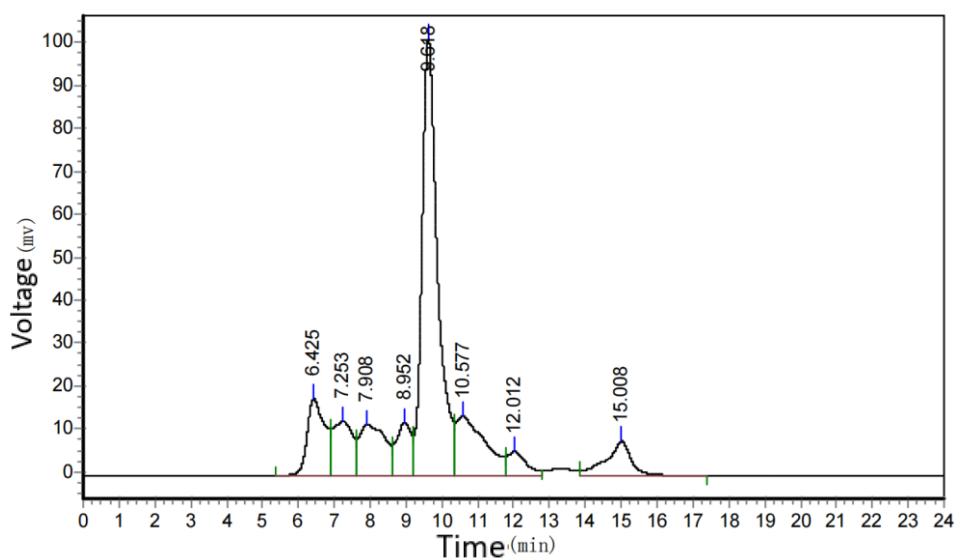

**Figure S4.** HPLC of sugar solution (CC particle size at 0.25~0.45 mm, temperature at 160 °C, stirring speed at 600 r/min, time at 2 h, H<sub>2</sub> pressure at 1.5 MPa, CW solid-to-solid ratio at 3:10, CAC solid - to - liquid ratio of 1:10)

Glucose:8.952; xylose: 9.618; arabinose:10.577.

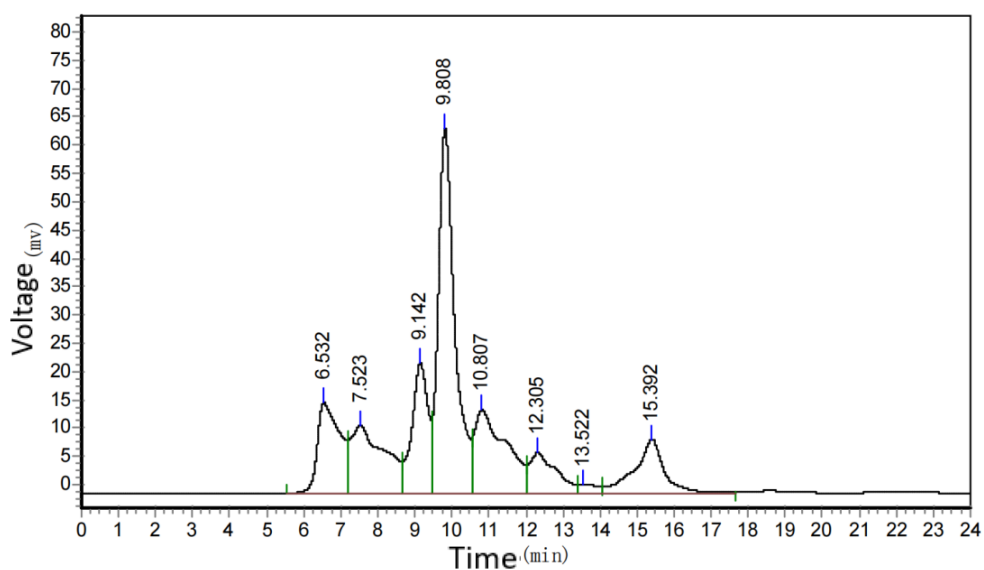

**Figure S5.** HPLC of sugar solution (CC particle size at 0.25~0.45 mm, temperature at 150 °C, stirring speed at 500 r/min, time at 2 h, H<sub>2</sub> pressure at 1.5 MPa, CW solid-to-solid ratio at 3:10, CAC solid - to - liquid ratio of 1:10)  
Glucose:9.142; xylose: 9.808; arabinose:10.807.

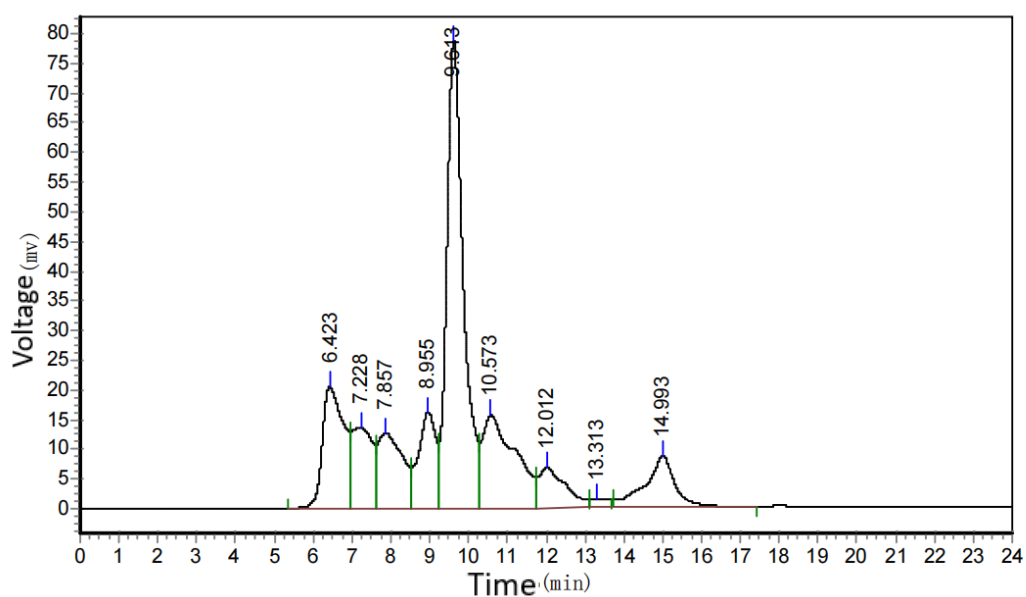

**Figure S6.** HPLC of sugar solution (CC particle size at 0.25~0.45 mm, temperature at 150 °C, stirring speed at 700 r/min, time at 2 h, H<sub>2</sub> pressure at 1.5 MPa, CW solid-to-solid ratio at 3:10, CAC solid - to - liquid ratio of 1:10)  
Glucose:8.955; xylose: 9.613; arabinose:10.573.

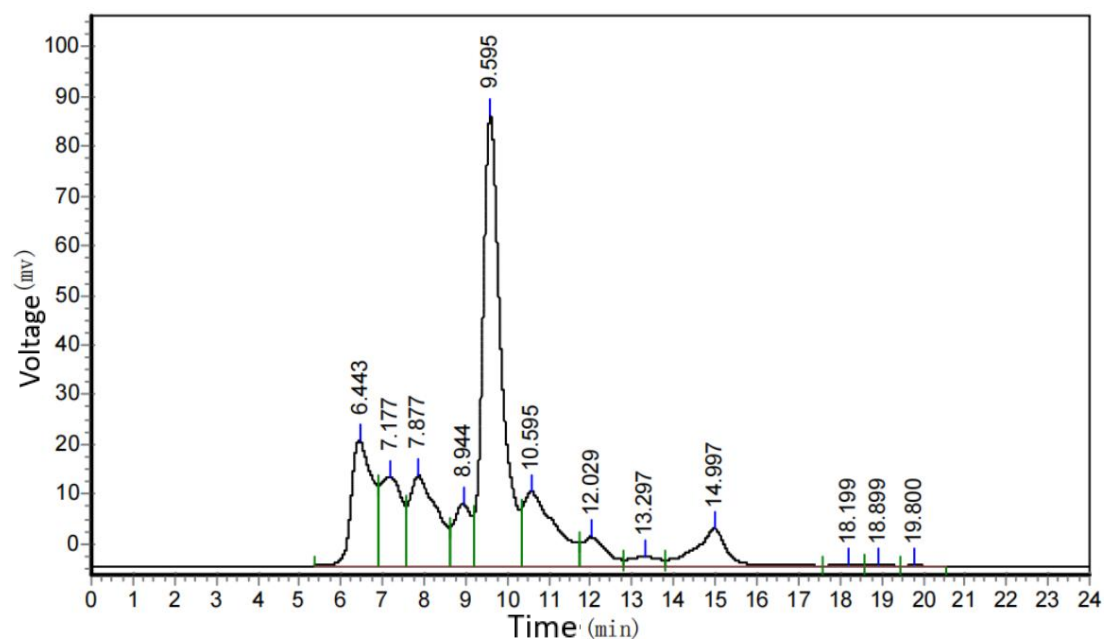

**Figure S7.** HPLC of sugar solution (CC particle size at 0.25~0.45 mm, temperature at 160 °C, stirring speed at 600 r/min, time at 2 h, H<sub>2</sub> pressure at 1.5 MPa, CW solid-to-solid ratio at 3:10, CAC solid - to - liquid ratio of 1:11)  
Glucose:8.944; xylose: 9.595; arabinose:10.595.

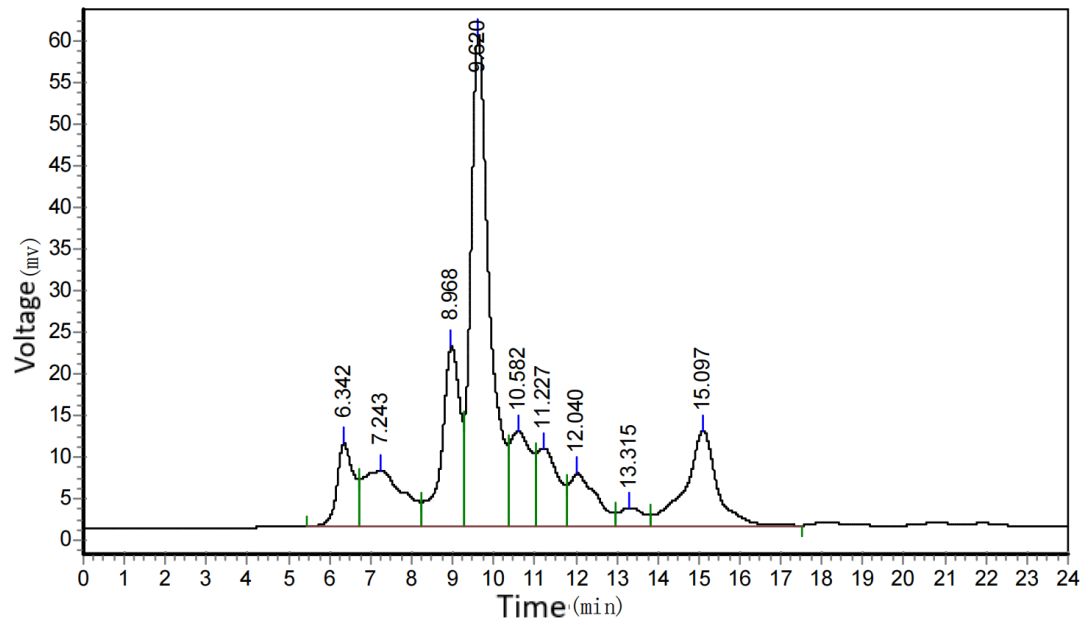

**Figure S8.** HPLC of sugar solution (CC particle size at 0.25~0.45 mm, temperature at 170 °C, stirring speed at 600 r/min, time at 2 h, H<sub>2</sub> pressure at 1.5 MPa, CW solid-to-solid ratio at 3:10, CAC solid - to - liquid ratio of 1:10)  
Glucose:8.968; xylose: 9.620; arabinose:10.582.
