# Supplementary material for: Production of Hemicellulose Sugars Combined with the Alkaline Extraction Lignin Increased the Hydro-Depolymerization of Cellulose from Corn Cob
Source: MDPI journal article supplement (doi:10.3390/su15119041), 2023-06-02
Supplement: s1 [file s1]

Archive with 1 entries (1 files):
- sustainability-2405120-supplementary.pdf
